# Supplementary material for: Brain Microbial Populations in HIV/AIDS: α-Proteobacteria Predominate Independent of Host Immune Status
Source: PubMed Central journal article supplement (PMC3552853; doi:10.1371/journal.pone.0054673), 2013-01-23

Figure S4:

Branton *et al.*

A

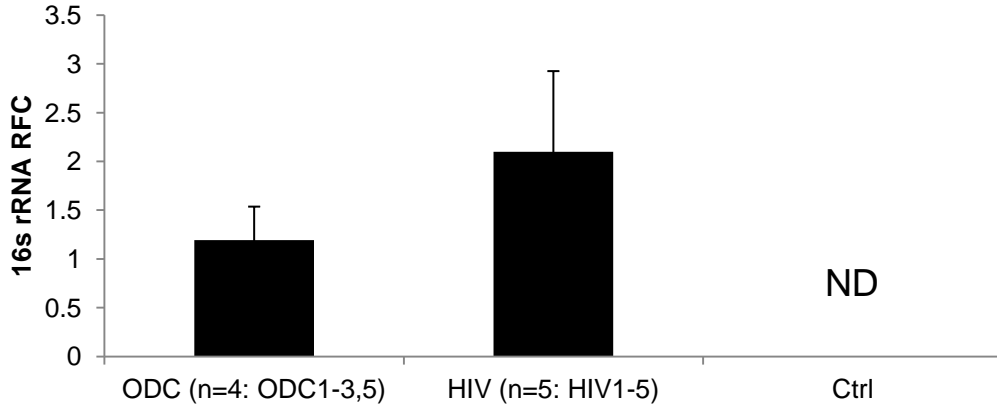

B

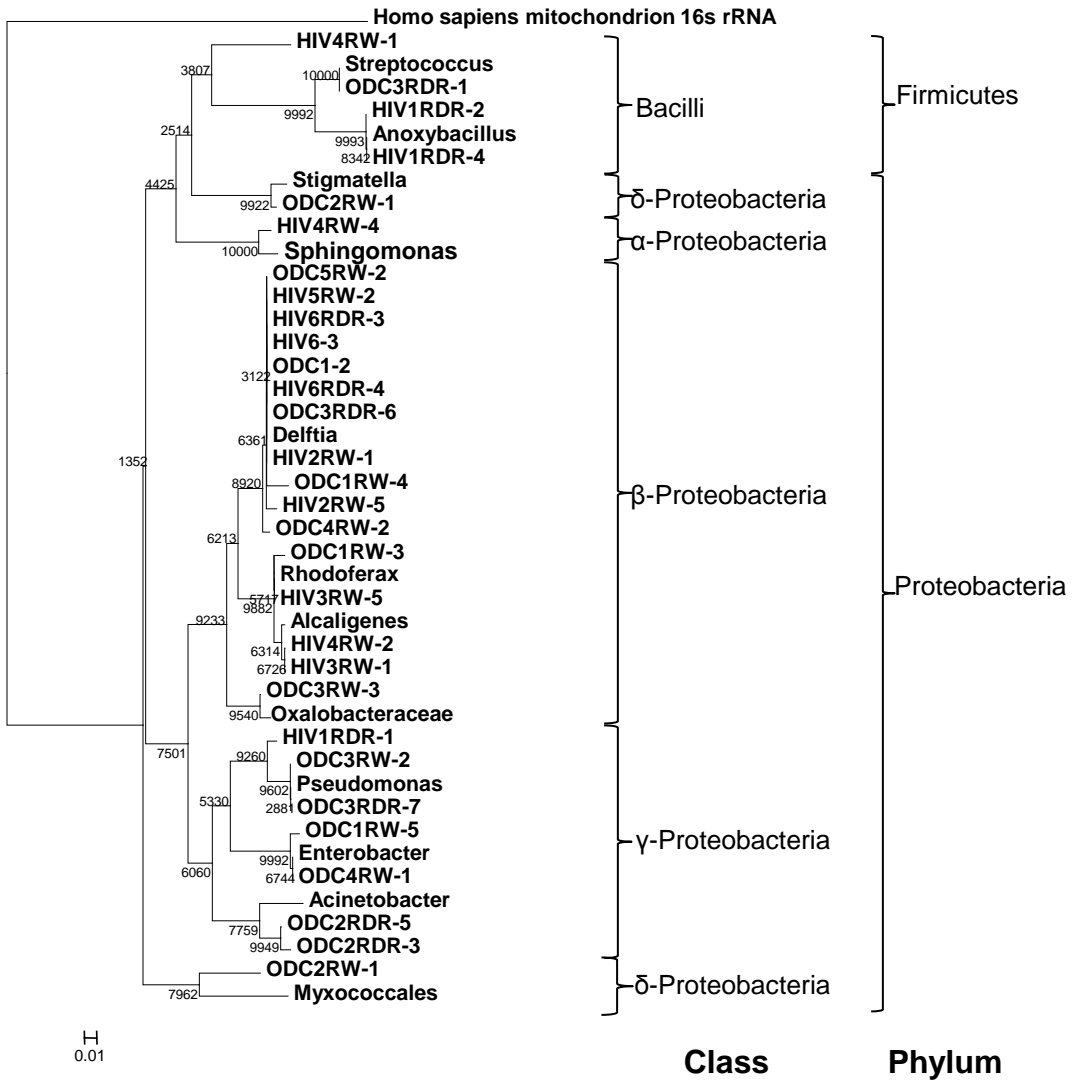

Supplement: pone.0054673.s004.pdf [file pone.0054673.s004.pdf]
